# Supplementary material for: Cost and Effectiveness of Long-Term Care Following Integrated Discharge Planning: A Prospective Cohort Study
Source: Healthcare (Basel). 2021 Oct 21;9(11):1413. doi: 10.3390/healthcare9111413 (PMC8621918; doi:10.3390/healthcare9111413)
Supplement: Supplementary file 1 [file healthcare-09-01413-s001.zip › healthcare-1384856-supplementary.pdf]

**Supplementary Table S1.** Comparison of patient characteristics between with follow-up and without follow-up in the standard transition cohort \*

| Variables                               |         | Follow-Up<br>Group (n = 49) | Without<br>Group (n = 135) | Follow-Up<br>p<br>Value § |
|-----------------------------------------|---------|-----------------------------|----------------------------|---------------------------|
| <i>Demographic characteristics</i>      |         |                             |                            |                           |
| Age, years                              |         | 80.88 ± 9.96                | 77.56 ± 12.35              | 0.092                     |
| Gender                                  | Male    | 33(67.3%)                   | 88(65.2%)                  | 0.922                     |
|                                         | Female  | 16(32.7%)                   | 47(34.8%)                  |                           |
| Body mass index, kg/m <sup>2</sup>      |         | 22.31 ± 4.24                | 23.01 ± 4.43               | 0.345                     |
| Education, years                        |         | 7.88 ± 5.37                 | 6.99 ± 4.75                | 0.282                     |
| Marital status                          | Single  | 5(10.2%)                    | 12(8.9%)                   | 0.963                     |
|                                         | Married | 32(65.3%)                   | 89(65.9%)                  |                           |
|                                         | Widowed | 12(24.5%)                   | 34(25.2%)                  |                           |
| Family support †                        |         | 1.08 ± 0.53                 | 0.96 ± 0.50                | 0.140                     |
| Smoking                                 | Yes     | 3(6.1%)                     | 14(10.4%)                  | 0.566                     |
| Drinking                                | Yes     | 5(10.2%)                    | 16(11.9%)                  | 0.961                     |
| <i>Clinical characteristics</i>         |         |                             |                            |                           |
| Charlson Comorbidity Index, score       |         | 4.25 ± 2.64                 | 4.59 ± 3.29                | 0.515                     |
| Multimorbidity Frailty Index            |         | 0.15 ± 0.87                 | 0.15 ± 0.11                | 0.898                     |
| Activities of Daily Living †            | 0       | 3(6.1%)                     | 29(21.5%)                  | 0.057                     |
|                                         | 1       | 8(16.3%)                    | 13(9.6%)                   |                           |
|                                         | 2       | 20(40.8%)                   | 41(30.4%)                  |                           |
|                                         | 3       | 18(36.7%)                   | 52(38.5%)                  |                           |
| Malnutrition Universal Screening Tool † | 0       | 33(67.3%)                   | 89(65.9%)                  | 0.763                     |
|                                         | 1       | 4(8.2%)                     | 16(11.9%)                  |                           |
|                                         | 2       | 12(24.5%)                   | 30(22.2%)                  |                           |
| Discharged with urinary catheter        | Yes     | 10(20.4%)                   | 22(16.3%)                  | 0.667                     |

\* Values are mean ± standard deviation or n (%). § Independent t test or Chi square tests p value. †

Family support: living or stay with spouse (yes 1, no 0), living with parents (yes 1, no 0), children (yes 1, no 0); activities of daily living: 0 completely independent, 1 mild disability, 2 moderate disability, 3 severe disability; Malnutrition Universal Screening Tool: 0 low risk, 1 mild risk, 2 high risk.
